# Supplementary material
Source: MDPI journal article supplement (https://www.mdpi.com/2673-4605/6/1/22)
Supplement: s1 [file s1]

**A.S. Gnedenkov<sup>1\*</sup>, S.V. Lamaka<sup>2</sup>, S.L. Sinebryukhov<sup>1</sup>, V.S. Filonina<sup>1</sup>, M.L. Zheludkevich<sup>2</sup>, S.V. Gnedenkov<sup>1</sup>**

<sup>2</sup>Institute of Surface Science, Helmholtz-Zentrum hereon GmbH, Geesthacht, Germany, 21502

\*E-mail: asg17@mail.com

Magnesium is very light metal, which possesses many useful properties such as high strength to weight ratio and good electrical and thermal conductivity. Magnesium and its alloys can be used in implant surgery as biodegradable materials. Taking into account the rapid degradation process of Mg alloys in chloride-containing solutions and very complex composition of the human body media, it is worth to study the mechanism and kinetics of the Mg alloys corrosion in solutions, which closely resemble that of human body fluids.

A comparative analysis of the corrosion activity of MA8 magnesium alloy (intended as bioresorbable material) in a medium for cultivation of mammalian cells (minimum essential medium, MEM) and 0.83 % NaCl solution was performed using scanning vibrating electrode technique (SVET), local pH measurements (SIET), hydrogen evolution tests, OCP, PDP and EIS tests. Corrosion products formed on the alloy surface are characterized using XRD and SEM-EDX analysis, Raman spectroscopy. Hydrogen evolution rate is higher for samples in NaCl solution in comparison with MEM. The impedance modulus in the frequency range from  $10^5$  Hz down to  $10^{-1}$  Hz for the sample immersed in MEM was higher than that for the sample immersed in NaCl. This indicates higher protective ability of the corrosion film formed in MEM compared to that formed during immersion in NaCl solution. Ca and P rich deposits were formed in the corrosion layer. The model of corrosion mechanism of MA8 magnesium alloy in MEM, which includes three stages of the development of corrosion product film, is proposed. The formation on the surface of magnesium alloy sample in MEM of corrosion product layer, including magnesium-substituted hydroxyapatite, stabilizes the local pH below 9.0 and, along with organic acids, does not allow increasing the pH during corrosion of the Mg alloy. The obtained results indicate the prospect of using bioresorbable magnesium in implant surgery [1, 2].

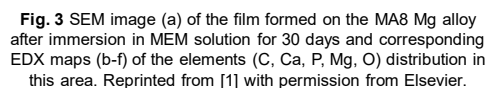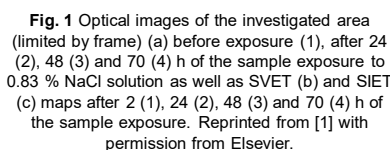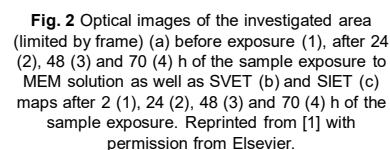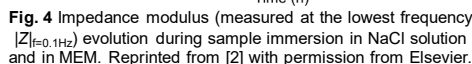

| Ion                | K <sup>+</sup> | Cl <sup>-</sup> | Ca <sup>2+</sup> | CO <sub>3</sub> <sup>2-</sup> | SO <sub>4</sub> <sup>2-</sup> | Mg <sup>2+</sup> | PO <sub>4</sub> <sup>3-</sup> | Na <sup>+</sup> |
|--------------------|----------------|-----------------|------------------|-------------------------------|-------------------------------|------------------|-------------------------------|-----------------|
| Concentration (mM) | 5.4            | 125.0           | 1.8              | 26.0                          | 0.8                           | 0.8              | 0.9                           | 142.9           |

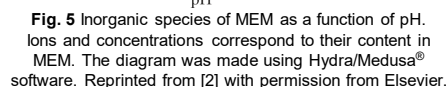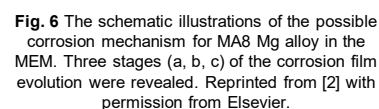

[2] A.S. Gnedenkov, S.V. Lamaka, S.L. Sinebryukhov, D.V. Mashtalyar, V.S. Egorkin, I.M. Imshinetskiy, A.G. Zavidnaya, M.L. Zheludkevich, S.V. Gnedenkov Electrochemical behaviour of the MA8 Mg alloy in minimum essential medium. Corros. Sci. 168 (2020) 108552.
